# Supplementary material
Source: publisher site journal article supplement (https://www.spandidos-publications.com/2443/downloadSupplementary)
Supplement: Supplementary file 1 [file downloadSupplementary]

## Sheet: Supp table 3
Table SIII. Univariate regression analysis.
	Coefficients	Standard Error	t Stat	P-value	Lower 95%	Upper 95%
Lines of therapy	-0.297744	0.139185	-2.13919	0.0375345	-0.577595	-0.017893
Age	-0.0219402	0.0207598	-1.05686	0.295866	-0.0636805	0.0198001
T stage	0.167804	0.25888	0.648192	0.520308	-0.354277	0.689884
Histology cc=1	0.424242	0.491714	0.862783	0.392547	-0.564415	1.4129
Sex m=1	0.175	0.512538	0.341438	0.734264	-0.855527	1.20553
Fuhrman grade	0.451195	0.306724	1.47101	0.148568	-0.167373	1.06976
